# Supplementary material
Source: Springer Nature journal article supplement (https://www.springermedizin.de/resource/supplementary/12874_2011_754_MOESM1_ESM.pdf/9432960)
Supplement: MOESM1 [file 9432960]

**Table 1: Critical Steps in *Brokered Dialogue***

| <b>Step No.</b> | <b>Critical Step</b>                                      | <b>Description</b>                                                                                                                                                                                                                                                                                                                                                                      |
|-----------------|-----------------------------------------------------------|-----------------------------------------------------------------------------------------------------------------------------------------------------------------------------------------------------------------------------------------------------------------------------------------------------------------------------------------------------------------------------------------|
| 1               | Issue/topic selection                                     | <p><b>General requirements:</b></p> <ul style="list-style-type: none"> <li>a) issue of importance/social significance</li> <li>b) lack of publicly accessible dialogue among stakeholders, contributing to, or resulting in some form of challenge, controversy, problem or obstacle.</li> </ul>                                                                                        |
| 2               | Introductory filmed interviews (documenting perspectives) | <ul style="list-style-type: none"> <li>- in-depth open-ended filmed interviews conducted with each participant</li> <li>- Purposeful sampling strategy: looking for particular perspectives on a topic</li> <li>- Documentation of “baseline” positions to permit analysis of changes in positions/perspectives as a result of participation in the <i>Brokered Dialogue</i></li> </ul> |
| 3               | Identification of preliminary dialogue domains            | <ul style="list-style-type: none"> <li>- combined approach of reviewing initial filmed interviews and written transcripts (open coding)</li> <li>- identification of emergent themes and patterns within and between participants’ accounts (constant comparison)</li> </ul>                                                                                                            |
| 4               | ‘First cut’ edits                                         | <ul style="list-style-type: none"> <li>- based on initial analysis, first ‘cuts’ of individual interviews assembled</li> <li>- resultant film clips highlight key points of individual participants’ perspectives on topic</li> <li>- participatory editing process ensures participants are comfortable showing clips to other participants (decisions recorded)</li> </ul>            |
| 5               | Responses to first cuts                                   | <ul style="list-style-type: none"> <li>- first cut clips shared with other participants and responses filmed</li> </ul>                                                                                                                                                                                                                                                                 |
| 6               | Analysis of responsive sessions and                       | <ul style="list-style-type: none"> <li>- building on initial analysis, review of responses and written</li> </ul>                                                                                                                                                                                                                                                                       |

|          |                                      |                                                                                                                                                                                                                                                                                                                                                                                                                                                                                                                                                                                                                                                                                                                                                                                |
|----------|--------------------------------------|--------------------------------------------------------------------------------------------------------------------------------------------------------------------------------------------------------------------------------------------------------------------------------------------------------------------------------------------------------------------------------------------------------------------------------------------------------------------------------------------------------------------------------------------------------------------------------------------------------------------------------------------------------------------------------------------------------------------------------------------------------------------------------|
|          | <b>'second cut' edits</b>            | <p>transcripts (as per step 3 above)</p> <ul style="list-style-type: none"> <li>- focus on <u>interaction</u> with perspectives of others</li> <li>- results in a 'second cut' of footage from responses (as per step 4 above – including participatory editing)</li> </ul>                                                                                                                                                                                                                                                                                                                                                                                                                                                                                                    |
| <b>7</b> | <b>Repeat</b>                        | <ul style="list-style-type: none"> <li>- The number of iterations depends on the complexity of the issue and dialogue, and the feasibility of continued iterations</li> </ul>                                                                                                                                                                                                                                                                                                                                                                                                                                                                                                                                                                                                  |
| <b>8</b> | <b>Rough cut and assembly</b>        | <ul style="list-style-type: none"> <li>- review of all approved footage, related transcripts by research team</li> <li>- iterative analysis between filmed footage and transcripts (constant comparison)</li> <li>- final decisions regarding inclusion of perspective-sharing/response/rebuttal (selective coding)</li> <li>- interview segments assembled to approximate dialogue</li> <li>- Aim is: <ul style="list-style-type: none"> <li>- (a) present unique insights arising from the dialogue</li> <li>- (b) fair representation of the normative structure of the dialogue</li> <li>- (c) reflect any evolution or change of perspective for individual participants that have become apparent over the course of the <i>Brokered Dialogue</i></li> </ul> </li> </ul> |
| <b>8</b> | <b>Revisions and approval</b>        | <ul style="list-style-type: none"> <li>- Rough cut assembly viewed by each participant</li> <li>- participants provide editorial feedback, can request edits to own footage (edits incorporated)</li> <li>- Each participant must provide approval for use of their footage</li> </ul>                                                                                                                                                                                                                                                                                                                                                                                                                                                                                         |
| <b>9</b> | <b>Final Cut and post-production</b> | <ul style="list-style-type: none"> <li>-Final versions of the film are prepared.</li> <li>-The length and content can be tailored to specific uses, e.g., teaching vs. a presentation at a public forum</li> </ul>                                                                                                                                                                                                                                                                                                                                                                                                                                                                                                                                                             |
|          |                                      |                                                                                                                                                                                                                                                                                                                                                                                                                                                                                                                                                                                                                                                                                                                                                                                |
